# Supplementary material for: Adverse Events During Pregnancy Associated with Third Generation Antiseizure Medications: A Real-World Analysis
Source: Research Square preprint supplement (doi:10.21203/rs.3.rs-7930539/v1), 2025-11-14
Supplement: Supplementary file 1 [file 532a96078bb9cd3d52573f40.docx]

**Tab S1. The approved time and MOA of AMSs**

| **Drug** | **FDA approved time** | **NMPA approved time** | **Mechanism of Action** |
| --- | --- | --- | --- |
| zonisamide | 2000.03 | 2019.02 | Multiple |
| lacosamide | 2008.01 | 2018.12 | Inactivation of sodium channels |
| brivaracetam | 2016.02 | 2024.06 | SV2A selective agonist |
| perampanel | 2012.01 | 2019.09 | AMPA antagonist |
| eslicarbazepine | 2013.11 | / | inactivation of sodium channels |
| rufinamide | 2018.11 | / | Multiple including Na+ channel |
| cannabidiol | 2018.06 | / | Multiple |
| tiagabine | 1997.09 | / | Enhancer of GABAergic transmission |
| stiripentol | 2018.08 | 2022.01 | Enhancer of GABAergic transmission |
| cenobamate | 2019.11 | / | voltage-gated sodium channels and the GABAergic system |
| vigabatrin | 2009.08 | 2022.05 | Enhancer of GABAergic transmission |
| clobazam | 2011.01 | 2022.09 | Enhancer of GABAergic transmission |
| ezogabine | 2011.06 | / | Neuronal potassium (K(+)) channel opener |
| felbamate | 1993.07 | / | Blockage of sodium channels and inhibition of glutamate neurotransmission |
| fenfluramine | 2020.06 | / | Multiple |

**Tab S2. The major algorithms applied for signal detection**

| Algorithms | Equation# | Criteria |
| --- | --- | --- |
| ROR | ROR=(a/b)/(c/d)  95%CI=eln(ROR)±1.96(1/a+1/b+1/c+1/d)^0.5 | ROR(95% CI-low)>1, N≥3 |
| PRR | PRR=(a/(a+c))/(b/(b+d))  χ2 =∑[(O-E)2/E]，［O=a, E =(a+b)(a+c)/(a+b+c+d)］ | PRR≥2, χ2≥4,  N≥3 |
| BCPNN | IC=log2a(a+b+c+d)/((a+c)(a+b))  IC025=eln(IC)-1.96(1/a+1/b+1/c+1/d)^0.5 | IC025>0 |

# a: reports involving both the suspect drug and the target adverse drug reaction (ADR). b: reports involving the target ADR with other medications (excluding the drug of interest). c: reports involving the suspect drug with other ADRs (excluding the event of interest). d: reports involving other medications and other ADRs. CI, confidence interval; χ2, chi-squared; IC, information component; IC025, the lower limit of the 95% two-sided CI of the IC;

| **TabS3 The signals detection in terms of HLTs of ASMs compared with reference drugs** | | | | | | | |
| --- | --- | --- | --- | --- | --- | --- | --- |
| HLT | Drugs | n | ROR(95%CI) | PRR | x2 | IC025 | Adverse event |
| Abortions not specified as induced or spontaneous | LCM | 8 | 0.88(0.43,1.81) | 0.88 | 0.12 | \ | No |
|  | BRV | 3 | 1.51(0.48,4.78) | 1.51 | 0.50 | 0.18 | No |
|  | LTG | 39 | 1.31(0.87,1.98) | 1.31 | 1.69 | 0.16 | No |
|  | LEV | 36 | 1.36(0.9,2.06) | 1.36 | 2.12 | 0.19 | No |
|  | OXC | 8 | 1.17(0.57,2.42) | 1.17 | 0.18 | 0.10 | No |
| Abortions spontaneous | LCM | 215 | 0.70(0.61,0.81) | 0.71 | 24.50 | \ | No |
|  | ZNS | 68 | 0.76(0.6,0.97) | 0.77 | 4.88 | \ | No |
|  | BRV | 30 | 0.45(0.31,0.64) | 0.45 | 20.30 | \ | No |
|  | PER | 28 | 0.49(0.34,0.72) | 0.50 | 14.40 | \ | No |
|  | RUF | 14 | 1.26(0.74,2.14) | 1.26 | 0.73 | 0.19 | No |
|  | ESL | 22 | 0.51(0.34,0.79) | 0.52 | 9.80 | \ | No |
|  | TGB | 3 | 0.29(0.1,0.91) | 0.30 | 5.09 | \ | No |
|  | CBD | 4 | 0.015(0.005,0.04) | 0.02 | 256.38 | \ | No |
|  | LTG | 733 | 0.57(0.53,0.62) | 0.58 | 176.77 | \ | No |
|  | LEV | 1783 | 3.06(2.85,3.29) | 3.00 | 1020.49 | 0.82 | Yes |
|  | OXC | 185 | 0.80(0.69,0.93) | 0.80 | 8.48 | \ | No |
| Amniotic fluid and cavity disorders of pregnancy NEC | ZNS | 3 | 2.0(0.62,6.40) | 2.00 | 1.41 | 0.30 | No |
|  | LTG | 40 | 5.29(2.88,9.72) | 5.29 | 36.05 | 0.59 | Yes |
|  | LEV | 11 | 0.56(0.29,1.09) | 0.56 | 3.02 | \ | No |
| Foetal complications NEC | LCM | 10 | 0.62(0.33,1.18) | 0.62 | 2.16 | \ | No |
|  | LTG | 73 | 1.52(1.11,2.07) | 1.52 | 7.08 | 0.26 | Yes |
|  | LEV | 74 | 1.84(1.35,2.51) | 1.84 | 15.49 | 0.40 | Yes |
|  | OXC | 5 | 0.40(0.16,0.98) | 0.40 | 4.33 | \ | No |
| Foetal growth complications | LCM | 10 | 0.27(0.14,0.50) | 0.27 | 19.42 | \ | No |
|  | ZNS | 19 | 1.88(1.18,2.99) | 1.88 | 7.44 | 0.55 | Yes |
|  | ESL | 4 | 0.81(0.30,2.17) | 0.81 | 0.18 | \ | No |
|  | LTG | 133 | 1.07(0.87,1.33) | 1.07 | 0.43 | 0.05 | No |
|  | LEV | 191 | 2.45(2.0,3.01) | 2.45 | 77.35 | 0.61 | Yes |
|  | OXC | 5 | 0.18(0.07,0.43) | 0.18 | 18.99 | \ | No |
| Gestational age and weight conditions | LCM | 195 | 0.83(0.72,0.96) | 0.83 | 6.10 | \ | No |
|  | ZNS | 83 | 1.21(0.97,1.51) | 1.21 | 3.01 | 0.22 | No |
|  | BRV | 32 | 0.61(0.43,0.87) | 0.62 | 7.59 | \ | No |
|  | PER | 26 | 0.59(0.4,0.87) | 0.59 | 7.34 | \ | No |
|  | RUF | 6 | 0.68(0.31,1.53) | 0.69 | 0.86 | \ | No |
|  | TGB | 5 | 0.63(0.26,1.52) | 0.63 | 1.07 | \ | No |
|  | LTG | 754 | 0.84(0.77,0.92) | 0.84 | 15.27 | \ | No |
|  | LEV | 1179 | 2.12(1.96,2.30) | 2.10 | 352.08 | 0.59 | Yes |
|  | OXC | 128 | 0.70(0.59,0.84) | 0.71 | 14.87 | \ | No |
| Haemorrhagic complications of pregnancy | ZNS | 5 | 2.23(0.90,5.52) | 2.23 | 3.20 | 0.45 | No |
|  | LTG | 29 | 1.03(0.66,1.63) | 1.03 | 0.02 | 0.02 | No |
|  | LEV | 35 | 1.67(1.07,2.59) | 1.67 | 5.31 | 0.30 | Yes |
|  | OXC | 12 | 2.19(1.19,4.05) | 2.19 | 6.62 | 0.55 | Yes |
| Hypertension associated disorders of pregnancy | LCM | 11 | 0.38(0.21,0.69) | 0.38 | 10.75 | \ | No |
|  | ZNS | 8 | 0.98(0.49,1.98) | 0.98 | 0.00 | \ | No |
|  | LTG | 127 | 1.49(1.18,1.88) | 1.49 | 11.25 | 0.27 | Yes |
|  | LEV | 127 | 1.76(1.39,2.23) | 1.76 | 23.19 | 0.40 | Yes |
|  | OXC | 12 | 0.55(0.31,0.99) | 0.55 | 4.14 | \ | No |
| Labour onset and length abnormalities | LCM | 130 | 1.31(1.09,1.58) | 1.31 | 8.48 | 0.29 | Yes |
|  | ZNS | 30 | 0.98(0.68,1.41) | 0.98 | 0.01 | \ | No |
|  | BRV | 25 | 1.1(0.74,1.64) | 1.10 | 0.22 | 0.09 | No |
|  | PER | 13 | 0.67(0.39,1.15) | 0.67 | 2.12 | \ | No |
|  | TGB | 3 | 0.86(0.27,2.67) | 0.86 | 0.07 | \ | No |
|  | LTG | 318 | 0.78(0.69,0.89) | 0.79 | 13.16 | \ | No |
|  | LEV | 511 | 2.02(1.79,2.28) | 2.01 | 136.62 | 0.54 | Yes |
|  | OXC | 37 | 0.45(0.32,0.63) | 0.45 | 23.79 | \ | No |
| Maternal complications of delivery NEC | LCM | 5 |  |  | 47.26 | 3.39 | Yes |
| Neonatal metabolic and endocrine disorders | LCM | 7 | 7.35(2.74,19.75) | 7.35 | 21.61 | 0.82 | Yes |
|  | LTG | 9 | 2.38(0.89,6.39) | 2.38 | 3.15 | 0.25 | No |
| Placental abnormalities (excl neoplasms) | ZNS | 17 | 7.32(4.33,12.38) | 7.30 | 76.17 | 1.56 | Yes |
|  | LTG | 42 | 1.44(0.96,2.15) | 1.44 | 3.16 | 0.21 | No |
|  | LEV | 32 | 1.09(0.72,1.67) | 1.10 | 0.18 | 0.06 | No |
|  | OXC | 5 | 0.69(0.28,1.70) | 0.69 | 0.65 | \ | No |
| Pregnancy complicated by maternal disorders | LCM | 9 | 0.50(0.26,0.98) | 0.50 | 4.27 | \ | No |
|  | ZNS | 10 | 2.01(1.06,3.80) | 2.01 | 4.79 | 0.51 | Yes |
|  | BRV | 3 | 0.78(0.25,2.45) | 0.78 | 0.18 | \ | No |
|  | LTG | 94 | 2.05(1.53,2.74) | 2.05 | 23.89 | 0.43 | Yes |
|  | LEV | 63 | 1.19(0.88,1.62) | 1.19 | 1.24 | 0.12 | No |
| Stillbirth and foetal death | LCM | 46 | 0.63(0.46,0.84) | 0.63 | 9.65 | \ | No |
|  | ZNS | 27 | 1.29(0.88,1.89) | 1.29 | 1.66 | 0.24 | No |
|  | RUF | 16 | 6.21(3.76,10.25) | 6.08 | 66.78 | 1.56 | Yes |
|  | LTG | 213 | 0.75(0.64,0.88) | 0.75 | 12.96 | \ | No |
|  | LEV | 403 | 2.63(2.27,3.04) | 2.62 | 184.55 | 0.69 | Yes |
|  | OXC | 35 | 0.62(0.44,0.88) | 0.63 | 7.51 | \ | No |
| Maternal complications of labour NEC | LTG | 8 |  |  | 14.80 | \ | Yes |
| Maternal complications of pregnancy NEC | LTG | 41 | 1.94(1.25,3.02) | 1.94 | 9.18 | 0.35 | Yes |
|  | LEV | 33 | 1.54(0.99,2.40) | 1.54 | 3.65 | 0.25 | No |
|  | OXC | 3 | 0.49(0.15,1.55) | 0.49 | 1.53 | \ | No |
| Neonatal hepatobiliary disorders | LTG | 38 | 2.51(1.54,4.09) | 2.51 | 14.66 | 0.44 | Yes |
|  | LEV | 28 | 1.61(0.99,2.63) | 1.61 | 3.77 | 0.27 | No |
| Newborn complications NEC | LTG | 35 | 2.49(1.5,4.14) | 2.49 | 13.31 | 0.43 | Yes |
|  | LEV | 20 | 1.07(0.63,1.82) | 1.07 | 0.06 | 0.04 | No |
|  | OXC | 6 | 1.37(0.59,3.19) | 1.37 | 0.55 | 0.18 | No |
| Umbilical cord complications | LTG | 9 | 4.16(1.28,13.52) | 4.16 | 6.65 | 0.30 | Yes |
|  | LEV | 4 | 0.97(0.3,3.16) | 0.97 | 0.00 | \ | No |
